# 1 **Temporal prediction elicits rhythmic pre-activation of relevant sensory** 2 **cortices**

3 **Abbreviated title:** Temporal prediction elicits sensory pre-activation

## 4 **Authors**

5 **[1,2]** Louise Catheryne Barne; **[1]** André Mascioli Cravo; **[2]** Floris P. de Lange; **[2]** Eelke Spaak

## 6 **Affiliations**

7 **[1]** Center for Mathematics, Computing and Cognition, Universidade Federal do ABC (UFABC), São  
8 Bernardo do Campo, SP, 09606-070, Brazil.

9 **[2]** Donders Institute for Brain, Cognition and Behaviour, Radboud University, The Netherlands.

10 **Corresponding author:** Louise Catheryne Barne; email: [louise.barne@ufabc.edu.br](mailto:louise.barne@ufabc.edu.br)

11 Number of pages: 25

12 The manuscript contains: 4 figures, 0 tables, 0 3D models.

13 Abstract: 167 words; Introduction: 641 words; Discussion: 1414 words.

14 **Author contributions statement:** All authors conceived the experiment. LCB performed the  
15 experiments and LCB and ES analysed the data. All the authors wrote and reviewed the manuscript.

16 **Acknowledgments:** This work was supported by São Paulo Research Foundation (FAPESP, grants  
17 2016/04258-0 and 2018/08844-7 awarded to LCB, and grant 2017/25161-8 awarded to AMC), by The  
18 Netherlands Organisation for Scientific Research (NWO Veni grant 016.Veni.198.065 awarded to ES  
19 and Vidi grant 452-13-016 awarded to FPdL), and by the European Research Council (ERC), under  
20 the European Union's Horizon 2020 research and innovation programme (grant agreement No. 678286  
21 to FPdL). The funders had no role in study design, data collection and analysis, decision to publish  
22 or preparation of the manuscript.

23 **Conflict of interest:** The authors declare no competing financial interests.

## 24 **1 Abstract**

25 Being able to anticipate events before they happen facilitates stimulus processing. The anticipa-  
26 tion of the contents of events is thought to be implemented by the elicitation of prestimulus tem-  
27 plates in sensory cortex. In contrast, the anticipation of the timing of events is typically associated  
28 with entrainment of neural oscillations. It is so far unknown whether temporal expectations interact  
29 with feature-based expectations, and, consequently, whether entrainment modulates the generation  
30 of content-specific sensory templates. In this study, we investigated the role of temporal expecta-  
31 tions in a sensory discrimination task. We presented participants with rhythmically interleaved visual  
32 and auditory streams of relevant and irrelevant stimuli while measuring neural activity using mag-  
33 netoencephalography. We found no evidence that rhythmic stimulation induced prestimulus feature  
34 templates. However, we did observe clear anticipatory rhythmic pre-activation of the relevant sensory  
35 cortices. This oscillatory activity peaked at behaviourally relevant, in-phase, intervals. Our results  
36 suggest that temporal expectations about stimulus features do not behave similarly to explicitly cued,  
37 non-rhythmic, expectations; yet elicit a distinct form of modality-specific pre-activation.

38 **Keywords:** rhythmic temporal expectations, feature-based expectations, oscillatory entrainment,  
39 multivariate pattern analysis, MEG

## 40 **2 Significance Statement**

41 The brain extracts temporal regularities from the environment to anticipate upcoming events in time.  
42 Furthermore, if prior knowledge about the contents of upcoming events is available, the brain is  
43 thought to leverage this by instantiating anticipatory sensory templates. How and whether both types  
44 of predictions (regarding time and content) share common mechanisms is still unclear. We investigated  
45 if neural sensory templates occur in response to a rhythmic stimulus stream with predictable temporal  
46 structure, and whether these templates follow the rhythmic structure of the task. We found that  
47 temporal rhythmic predictions did not induce sensory templates, but rather modulated the excitability  
48 in early sensory cortices. We thereby shed light on the neural mechanisms underlying perception with  
49 multidimensional expectations.

### 50 **3 Introduction**

51 Predicting upcoming events enables efficient resource allocation and can lead to behavioural benefits  
52 and neural processing improvements (Summerfield and De Lange, 2014; de Lange et al., 2018). These  
53 predictions, or expectations, can come from various sources. For example, predictions can be the  
54 result of an explicit instruction (“when you see X, expect Y”), they can be (implicitly) inferred from  
55 the statistics of the world (Oliva and Torralba, 2007; Bar, 2004; Seriès and Seitz, 2013; Spaak and de  
56 Lange, 2020), or they can stem from temporal regularities in the sensory input (de Lange et al., 2018;  
57 Nobre and Van Ede, 2018). One proposed mechanism of how expectations can modulate perception  
58 is by inducing sensory templates through prestimulus baseline increases in sensory neurons tuned  
59 to the features of expected stimuli (SanMiguel et al., 2013; Kok et al., 2014; Kok et al., 2017). A  
60 recent study using multivariate decoding techniques in MEG signal showed that an auditory cue  
61 that allowed observers to form an expectation of a particular grating orientation induced a visual  
62 prestimulus activation similar to the feature-specific response evoked by the actual visual stimulation  
63 (Kok et al., 2017).

64 It is unknown whether a similar mechanism is at play in anticipating the likely *time* of relevant  
65 events. Several studies have found faster and more accurate responses when stimuli are expected in  
66 time (Nobre et al., 2007; Rohenkohl et al., 2012; Nobre, 2001). Studies in human and non-human  
67 primates have shown that neural populations in primary cortical regions can synchronise in frequency  
68 and phase to external rhythmic temporal patterns (Lakatos et al., 2008; Schroeder and Lakatos, 2009;  
69 Lakatos et al., 2013; Besle et al., 2011; Cravo et al., 2013; Henry et al., 2014). High and low neuronal  
70 ensemble excitability states could be entrained to stimulus timing in such a way that optimal phases  
71 of processing become aligned with the expected moments of task-relevant stimuli (Lakatos et al., 2008;  
72 Schroeder and Lakatos, 2009; Lakatos et al., 2013).

73 Generally, entrainment is marked by a strong phase coherence of neural signals at the stimulated  
74 frequency and by correlations between phase and attention and/or behavioural performance. How-  
75 ever, there is no consensus on the definition of neural oscillatory entrainment (Obleser et al., 2017;  
76 Breska and Deouell, 2017; Lakatos et al., 2019; Haegens, 2020). Critically, most previous studies have  
77 used a stimulus-driven paradigm (i.e., testing entrainment at the same time when driving stimuli are  
78 present), which makes conclusions about the underlying mechanism hard to interpret, especially in  
79 non-invasive human studies (Haegens and Golumbic, 2018). There is an increasing debate whether  
80 the oscillatory modulation is purely due to superimposed evoked responses (Capilla et al., 2011;  
81 van Diepen and Mazaheri, 2018) or to true endogenous oscillatory entrainment (Doelling et al., 2019).

82 A few studies have reported behavioural and neural oscillatory modulations persisting after the offset  
83 of rhythmic stimulation (Lakatos et al., 2013; Spaak et al., 2014), thus providing stronger evidence  
84 for the importance of neural entrainment.

85 The existence of these two mechanisms for preparing for upcoming stimuli (prestimulus templates  
86 in response to explicit cues, neural entrainment in response to rhythmically induced temporal expecta-  
87 tions) raises the interesting question of whether and how these two mechanisms interact or complement  
88 each other. We here aim to shed light on this question. Specifically, we hypothesized that stimulus-  
89 specific sensory templates might emerge at the relevant phases of the entraining signal, i.e., the time  
90 points of expected stimulation, while fading at the unexpected time points. Previewing our results, we  
91 did not find evidence that rhythmic temporal expectations elicit feature-specific prestimulus templates.  
92 We found instead a clear modality-specific (yet stimulus-non-specific) oscillating representation in the  
93 neural signals, demonstrating entrained rhythmic pre-activation of relevant sensory cortices. This  
94 sensory entrainment persisted after the offset of rhythmic stimulation. Our results demonstrate the  
95 existence of rhythmic nonspecific sensory pre-activation in the brain, highlighting the multitude of  
96 ways in which expectations can modulate neural activity.

## 97 **4 Materials and Methods**

### 98 **4.1 Data and script availability**

99 All data, as well as all presentation and analysis scripts, will be made freely available online upon  
100 publication, at the Donders Repository.

### 101 **4.2 Participants**

102 Forty-two adult volunteers (16 male, average 27 years) participated in the experiment. Volunteers  
103 were excluded when they had more than 20% of no response trials ( $n=7$ ) or low signal-to-noise ratio  
104 in MEG recordings ( $n=1$ , dental wire noise). Thirty-four were included for the behavioural and  
105 MEG analyses. All participants had normal or corrected-to-normal visual acuity, normal hearing,  
106 and health conditions consistent with the experiment. This study was approved under the general  
107 ethics approval (“Imaging Human Cognition”, CMO 2014/288) by CMO Arnhem-Nijmegen, Radboud  
108 University Medical Centre. All participants provided written informed consent.

### 109 **4.3 Apparatus**

110 Computational routines were generated in MATLAB (The MathWorks) and stimuli were presented  
111 using “Psychtoolbox” (Brainard, 1997). A PROpixx projector (VPixx Technologies, Saint-Bruno, QC  
112 Canada) was used to project the visual stimuli on the screen, with a resolution of 1920x1080 and  
113 a refresh rate of 120 Hz, and the audio stimuli were presented through MEG-compatible ear tubes.  
114 Behavioural responses were collected via a MEG-compatible response box.

115 MEG was recorded from a whole-head MEG system with 275 axial gradiometers (VSM/CTF Sys-  
116 tems, Coquitlam, BC, Canada) in a magnetically shielded room and digitized at 1200 Hz. Eye position  
117 data was recorded during the experiment using an Eyelink 1000 eye tracker (EyeLink, SR Research  
118 Ltd., Mississauga, Ontario, Canada) for further eye blink and saccade artefact rejection. During the  
119 session, head position was recorded and monitored online (Stolk et al., 2013) by coils placed at the  
120 nasion, left and right ear. At the end of each block, participants were asked to reposition the head  
121 in case they moved more than 5 mm away from the initial position. MEG analyses were performed  
122 using FieldTrip software (Oostenveld et al., 2011) and repeated measures ANOVA were performed in  
123 JASP, Version 0.9.0 (JASP Team, 2018).

### 124 **4.4 Stimuli and general task**

125 Participants performed auditory and visual discrimination tasks. In visual trials, the target was a  
126 grating of 3 degrees of visual angle, with a spatial frequency of 2 cycles per degree (cpd), random  
127 phase, and with one of six possible orientations (15, 45, 75, 105, 135, 165 degrees) surrounded by a  
128 magenta circle and presented centrally for 100 ms. In auditory trials, one of six possible pure tones  
129 (501, 661, 871, 1148, 1514, 1995 Hz) was presented for 100 ms as a target.

130 The target was always followed by a delay period, after which a probe stimulus was presented.  
131 The probe was similar to the target with the exception of the pitch/orientation feature. Participants  
132 had to judge whether the probe was tilted clockwise (CW) or counterclockwise (CCW) relative to the  
133 target in visual trials or whether the probe had a frequency higher or lower than the target in auditory  
134 trials. They always responded with a button press of either the index (lower/CCW) or middle finger  
135 (higher/CW) of their right hand.

136 Stimulus presentation timing was either non-rhythmic or rhythmic, in order to manipulate temporal  
137 expectations. The experimental session started with the non-rhythmic trials and the rhythmic trials  
138 were presented subsequently.

#### 139 **4.4.1 Non-rhythmic trials**

140 The non-rhythmic trials began with a central white fixation point (0.4 degrees of visual angle) with a  
141 surrounding cyan circle (3 degrees), and after a random inter-trial interval (ITI) chosen from a uniform  
142 distribution between 0.6 s and 1.6 s, a target was presented for 100 ms. Three seconds after target  
143 onset, the probe was presented, and participants had to indicate their response. There was no time  
144 limit for the responses. Participants received performance feedback for 400 ms and a new ITI started  
145 immediately (Figure 1 A). There were 24 trials in each block. Six blocks were randomly presented to  
146 participants (three auditory and three visual), resulting in a total of 72 trials per attended sensory  
147 modality. To ensure participants understood the task, they performed at least six easy practice trials  
148 for each condition before the procedure. Practice trials were not included in analysis.

149 Performance in non-rhythmic trials was also used to calibrate visual and auditory parameters for the  
150 following rhythmic experimental manipulation. The staircase method was QUEST as implemented  
151 in the Palamedes Toolbox (Prins and Kingdom, 2018). For both conditions, a Cumulative Normal  
152 function with a lapse rate of 0.1 and the mean of the posterior were used as the staircase parameters.  
153 For the visual condition, the beta value was 1 and the prior alpha range was a normal distribution with  
154 mean of 10 degrees, standard deviation of 5, ranging from 0 to 20 degrees. During the experiment,  
155 the chosen alpha value plus a random value from a normal distribution function (mean 0, std 1) was  
156 added or subtracted from the target orientation value. For the auditory condition, the beta value was  
157 100, and the prior alpha range was a normal distribution with mean of 0.1, standard deviation of 0.1,  
158 ranging from 0 to 0.2. During the experiment, the chosen alpha value plus a random value from a  
159 normal distribution function (mean 0, std 0.01) were multiplied with the target pitch value and the  
160 resulting value was added or subtracted from the target value. Beta and alpha prior values were based  
161 on prior piloting results.

#### 162 **4.4.2 Rhythmic trials**

163 In rhythmic blocks, each trial started with a fixation point and a cyan circular border (Figure 1 A).  
164 Half a second later, the first attended-modality target stimulus was presented for 0.1 s. This stimulus  
165 was presented several times (3 to 6, balanced and randomly chosen per trial) with a fixed interval  
166 between them (1 s) to create a rhythmic stream. Interleaved and irrelevant to the task, a second  
167 stream of stimuli in the other sensory modality stimuli was presented. Therefore, the interval between  
168 adjacent stimuli was 0.5 s. The last relevant stimulus of the sequence (target) was marked by a change  
169 in an irrelevant feature to warn participants that the next presented stimulus would be the probe.

170 The warning signal was a higher volume sound (auditory trials, equal to staircase target volume) or a  
171 magenta outline (visual trials, instead of cyan outline). After 500 ms of the last target presentation,  
172 an irrelevant modality stimulus was always presented. Probes had a positive or negative difference in  
173 orientation or pitch based on the output from the previous staircase procedure and were also marked  
174 by the magenta outline or by the volume increase. The interval between target and probe (SOA) could  
175 be 1, 1.5, 2, 2.5 or 3 s with the respective probabilities: 25%, 12.5%, 25%, 12.5%, 25%. Participants  
176 were informed at the beginning of the experimental session that the timing of the probe was most  
177 likely to follow the relevant rhythm, i.e., it would likely to occur in phase with it. A new trial with a  
178 new relevant stimulus would appear 2 s after the probe. Each block consisted of 12 trials.

179 There were 16 auditory and 16 visual rhythmic blocks. There were 192 trials for each sensory  
180 modality. Volunteers performed 48 trials for each in-phase delays (1,2,3 s) and 24 trials for each anti-  
181 phase SOAs (1.5, 2.5 s) in each sensory modality condition. The blocks were always presented in a  
182 pseudo-random order, where no more than 3 same type blocks could be presented in a row.

#### 183 **4.5 Behavioural analysis**

184 Trials where participants did not respond within 3 s post-probe range were treated as incorrect trials  
185 in accuracy analyses and were excluded from reaction time (RT) analyses. Accuracy scores were  
186 arcsin-transformed before all statistical tests to improve normality. Both measures were submitted to  
187 a 2x5 repeated measures ANOVA with modality (auditory or visual) and the five SOAs as factors.  
188 Mauchly's test of sphericity was performed, and Greenhouse–Geisser correction was applied in case of  
189 sphericity violation. Holm correction for multiple comparisons was performed for all post-hoc analyses,  
190 when applicable.

#### 191 **4.6 MEG pre-processing**

192 An anti-aliasing low-pass filter at 600 Hz was used during the online MEG recordings. Non-rhythmic  
193 trials were segmented between 0.2 s before the target until 0.5 s after the probe. Rhythmic trials  
194 were segmented between 0.2 s before the first stream stimulus until 0.5 s after the probe. After  
195 segmentation, synthetic 3rd order gradient correction was applied and the channel- and trial-wise mean  
196 was subtracted from the traces. Trials with eye movements, muscular activity and with an unusually  
197 high variance were excluded from the further analyses using a semi-automatic procedure (rejected  
198 trials: mean = 7.2%, SD = 3.3%). Sensors showing an unusually high variance were rejected following  
199 the same procedure (rejected sensors: mean = 2.8%, SD = 1.2%). After artifact rejection, data  
200 were off-line downsampled from 1200 Hz to 400 Hz to speed up analyses, followed by an independent

201 component analysis to identify and remove residual eye, heart and other muscular components. A  
202 discrete Fourier transform was used to suppress line noise at 50 Hz and its harmonics, 100 Hz and 150  
203 Hz.

#### 204 **4.7 Planar combined event related fields**

205 For the analysis of event-related fields (Figure 2), all trials were low pass filtered at 35 Hz and baseline  
206 corrected from -0.1 to 0 s. All non-rhythmic trials (approximately 72 per participant) were considered  
207 from -0.2 s to 2.5. For rhythmic trials, only 2.5 and 3 SOAs (approximately 72 per participant) trials  
208 were considered from -2.2 s to 2.5 s, including the 3 repetitions of relevant and irrelevant stimuli  
209 in a trial. For each participant, trials were time-lock averaged. MEG axial gradiometers were then  
210 transformed to planar configuration (Bastiaansen and Knösche, 2000) and combined as the root-  
211 mean-square of horizontal and vertical sensors. The combined planar activity from participants were  
212 averaged in the end.

#### 213 **4.8 Multivariate pattern analyses**

214 MVPA were performed using linear discriminant analysis (LDA) as implemented in MVPA-Light  
215 toolbox (<https://github.com/treder/MVPA-Light>). Features consisted of activity in the MEG sensors  
216 ( $267 \pm 3$  sensors). Feature scaling was performed as pre-processing step in all analyses: data were  
217 normalized using z-score transformation based only on the training set. Final scores were calculated  
218 based on the distances estimated by LDA from the six classes' centroids in multiclass classification or  
219 from the hyperplane in the two-class classification.

##### 220 **4.8.1 Specific feature classification: Temporal generalisation**

221 Only the rhythmic trials with the longest delay periods (2.5 s and 3 s) were used in the testing set  
222 here, as well as all non-rhythmic trials. Testing trials were locked to the target and were segmented  
223 from -0.1 s to 2.5 s in rhythmic trials and from -0.1 s to 3 s in non-rhythmic trials. The training set  
224 was the presentation time window (-0.1 to 0.5) from the rhythmic shortest trials (SOA 1, 1.5, 2 s).  
225 Segments were baseline corrected based on pre-target window (-0.1 to 0 s). Given that each model had  
226 six different classes for orientations (visual) and tones (auditory), a multiclass LDA was used.

227 For non-rhythmic trials, only the attended-modality sensory model was tested. At the end, the  
228 average between auditory and visual trials was computed. For rhythmic trials, both models were  
229 tested since all rhythmic trials contained one visual and one auditory presented feature. Depending  
230 on the test trial task, the auditory and visual scores were assigned an attended or unattended label.



231 For example, in an orientation discrimination (attend-visual) trial, the grating to be decoded was  
232 the visual attended feature and the tone was the auditory unattended feature, while in a pitch task  
233 (attend-auditory) trial the labels were attended auditory and unattended visual. At the end, scores  
234 from visual and auditory models were averaged in relation to their rhythmic attention labels.

#### 235 **4.8.2 Specific feature classification: Temporal decoding**

236 Trials were locked to the target and segmented until the probe moment. Subsampling by averaging  
237 32.5 ms temporal windows (13 points in time) was applied to improve the signal-to-noise ratio. We  
238 performed classification in a leave-one-trial-out cross-validation approach. Accordingly, excluding the  
239 rhythmic test trial, all stimuli segments from rhythmic and non-rhythmic trials were used for training.  
240 Segments were baseline corrected based on pre-target window (-.1 to 0 s). The activity used in the  
241 training set was the average activity of each axial sensor from 0.1 to 0.2 s after a stimulus presentation.  
242 This training time period was chosen based on a previous study showing that the visual template effect  
243 (Kok et al., 2017) resembles the ERF peak activity (Figure 3 B). Depending on the test trial task,  
244 the auditory and visual scores were assigned an attended or unattended label. Trial length was SOA-  
245 condition dependent.

#### 246 **4.8.3 Specific feature classification: Score**

247 The scores were the estimated rho from a Spearman rank correlation test between the estimated  
248 distances and an “ideal distances matrix” (Aukstulewicz et al., 2019). This ideal matrix was the  
249 expected trial distance, or rank, for each of the six classes’ centroids. For the visual condition, with  
250 orientation being a circular variable, the expected distance rank was the lowest, 0, for the correct  
251 label (i.e. 15 degrees), 1 to the two closest label neighbours (165 and 45 degrees), 2 for the middle  
252 far two classes (135 and 75 degrees) and 3 for the further class (105 degrees). The auditory condition  
253 matrix was different from the visual given that frequency is a linear variable. The lowest distances  
254 were drawn along the diagonal and gradually higher ones for further off-diagonal positions.

#### 255 **4.8.4 Sensory modality nonspecific classification**

256 Only longest-delay trials (2.5 s and 3 s) for rhythmic and non-rhythmic conditions were used in this  
257 analysis. They were target locked, cut between -0.2 s until the probe moment, and baseline corrected  
258 based on pre-target window (-.1 to 0 s). Here we used a two-class LDA, again with a temporal  
259 generalisation approach. To keep computational time manageable, data was downsampled to 200 Hz  
260 before this analysis. The scores here were the distances to the decision hyperplane calculated by LDA.

## 261 4.8.5 Statistics

262 Scores from trials were averaged within each time point for each participant. To assess significant  
263 differences from chance, we used cluster-based permutation tests based on paired t-scores (Maris and  
264 Oostenveld, 2007), with 1000 random permutations.

## 265 5 Results

266 We investigated the role of temporal expectations in a multisensory task. In different blocks, par-  
267 ticipants ( $n = 34$ ) had to perform either a pitch (Auditory blocks) or orientation (Visual blocks)  
268 discrimination task. The first part of the experimental session consisted of simple discrimination tri-  
269 als, where participants were presented with a single visual or auditory target followed by a unisensory  
270 probe of the same modality (Figure 1 A). Participants had to judge whether the probe was titled  
271 clockwise or anti-clockwise relative to the target in visual trials or whether the probe had a frequency  
272 higher or lower than the target in auditory trials. We refer to these trials as the “non-rhythmic” trials.  
273 During these non-rhythmic trials, difficulty was adjusted according to an adaptive staircase procedure  
274 (Watson and Pelli, 1983), in order to titrate the difference in grating angle and tone frequency to an  
275 appropriate difficulty level for the rest of the experiment.

276 In the second part of the experimental session, targets and probes were preceded by a stream of  
277 2 Hz alternating visual and auditory stimuli (rhythmic trials). In a blockwise fashion, participants  
278 had to either pay attention to the visual stream (1 Hz) and perform the visual orientation task or  
279 pay attention to the auditory stream (1 Hz) and perform the pitch discrimination task. Critically,  
280 probes could appear after one of five possible stimulus onset asynchrony (SOA) intervals: 1, 1.5, 2,  
281 2.5, or 3 s. Integer intervals were in-phase relative to the attended stream, while 1.5 and 2.5 s were  
282 in anti-phase. The probability of presentation at the in-phase SOAs was 25%, whereas it was 12.5%  
283 at the anti-phase SOAs, making it more likely that the target would be presented in-phase with the  
284 relevant stream (Figure 1 A).

285 Visual and auditory stimuli presented in the stream had the same orientation and pitch as the  
286 target (or, one could also say, there was a rhythmic stream of multiple identical targets). They could  
287 have one of six possible orientations and one of six possible pitches. The last target in the stream  
288 was identifiable to the participant by either a coloured ring (visual) or increased volume (auditory),  
289 thereby prompting the beginning of the delay. With this design, including a clear delay period, we  
290 could test whether specific (i.e. decodable orientation and tone signals) and/or non-specific sensory  
291 activation continued after the stimulation period.

## 292 5.1 Behavioural performance

293 We first tested whether, in the present task, rhythmic presentation of targets resulted in a rhythmic  
294 modulation of perceptual performance. We measured performance based on accuracy and reaction  
295 time (RT) (Figure 1 B). Accuracy was lowest for the earliest SOA (mean = 76.7%, SEM = 1.8%),  
296 an effect most pronounced for the attend-auditory blocks. This was backed up by a significant main  
297 effect of SOA ( $F(4,132) = 6.37$ ,  $p < 0.001$ ,  $\omega^2 = 0.03$ ), as well as an interaction of SOA and attended  
298 modality ( $F(4,132) = 5.02$ ,  $p < 0.001$ ,  $\omega^2 = 0.02$ ). Despite this interaction, SOA affected accuracy  
299 in both the attend-visual and attend-auditory blocks (simple main effects analysis of SOA, auditory:  
300  $F(1) = 7.45$ ,  $p < 0.001$ ; visual:  $F(1) = 2.89$ ,  $p = 0.025$ ). However, only the first SOA differed from  
301 the other intervals (1.5 s:  $81.3 \pm 1.8\%$ ,  $t(33) = -3.39$ ,  $p = 0.015$ ,  $d = -0.582$ ; 2 s:  $81.8 \pm 1.8\%$ ,  $t(33)$   
302  $= -4.76$ ,  $p < 0.001$ ,  $d = -0.82$ ; 3 s:  $80.7 \pm 1.8\%$ ,  $t(33) = -3.93$ ,  $p = 0.004$ ,  $d = -0.67$ ), except from 2.5  
303 s ( $79.9 \pm 1.9\%$ ,  $t(33) = -2.34$ ;  $p = 0.181$ ,  $d = -0.4$ ). Overall accuracy was not different between the  
304 modalities (main effect of sensory modality:  $F(1,33) = 0.02$ ,  $p = 0.886$ ,  $\omega^2 = 0$ ).

305 Reaction times decreased with increasing SOA (1 s:  $896 \pm 38$  ms; 1.5 s:  $780 \pm 28.5$  ms; 2 s:  $743 \pm$   
306  $24.5$  ms; 2.5 s:  $730 \pm 23.5$  ms; 3 s:  $735 \pm 23.6$  ms; main effect of SOA  $F(4,132) = 32.27$ ,  $p < 0.001$ ,  $\omega^2$   
307  $= 0.12$ ). Reaction times were not significantly different between attended sensory modalities ( $F(1,33)$   
308  $= 0.09$ ,  $p = 0.763$ ,  $\omega^2 = 0$ ). We did observe an interaction of SOA and attended modality ( $F(4,132)$   
309  $= 7.57$ ,  $p < 0.001$ ,  $\omega^2 = 0.02$ ), while SOA affected reaction time in both the attend-visual and attend-  
310 auditory blocks (simple main effects analysis of SOA, auditory:  $F(1) = 28.98$ ,  $p < 0.001$ ; visual:  $F(1) =$   
311  $12.36$ ,  $p < 0.001$ ). Responses for the shortest SOA (1 s) were slower than for the other SOAs (post-hoc  
312 t-tests,  $6.05 < t(33) < 7.32$ , all  $p < 0.001$ ;  $1.04 < d < 1.26$ ), and responses for the 1.5 s SOA were slower  
313 than those for the longer SOAs (2 s:  $t(33) = 2.82$ ,  $p = 0.032$ ,  $d = 0.48$ ; 2.5 s:  $t(33) = 3.29$ ,  $p = 0.014$ ,  $d$   
314  $= 0.56$ ; 3 s:  $t(33) = 3.18$ ,  $p = 0.016$ ,  $d = 0.55$ ), while response times for the SOAs  $> 1.5$  s did not differ  
315 among one another ( $-0.59 < t(33) < 1.31$ , all  $p > 0.05$ ,  $-0.1 < d < 0.22$ ). Taken together, behavioural  
316 performance provides no evidence for a significant rhythmic modulation of perceptual performance,  
317 but instead points toward a hazard rate effect.

## 318 5.2 Stimulus-specific information is decodable from MEG sensors during stimulation 319 only

320 Next, we turned our attention to the neural consequences of interleaved multisensory rhythmic stimu-  
321 lation. Figure 2 shows the event-related fields for MEG sensors approximately overlying auditory and  
322 visual cortices, in all different conditions. As expected, auditory and visual stimuli elicited pronounced

323 event-related fields at the auditory and visual associated sensors. The evoked activity returned to  
324 baseline levels approximately 1 s after stimulus presentation.

325 To quantify whether the neural signals contained stimulus-specific information (i.e., information  
326 about which of the six auditory pitches or visual orientations was present), we performed a multivariate  
327 pattern analysis. Specifically, we trained classifiers on the target stimulus period (-100 to 500 ms)  
328 from rhythmic trials with SOAs 1, 1.5, and 2 s, and quantified how well these generalised to both the  
329 stimulus and delay periods of the rhythmic trials with the longest SOAs (2.5 s and 3 s), as well as  
330 to the non-rhythmic trials. Train and test data here are thus fully independent. We investigated the  
331 cross-temporal generalisation of these signals between the full stimulus training period to the combined  
332 stimulus and delay testing period.

333 We observed a strong feature-specific signal when training and testing the classifier on similar time  
334 points (Figure 3 A). In all conditions, there were high levels of stimulus information in the diagonal  
335 (non-rhythmic: from 55 ms to 305 ms post-stimulus,  $p < 0.001$ ; attended rhythmic: from 50 ms  
336 to 295 ms post-stimulus  $p < 0.001$ ; unattended rhythmic: from 75 ms to 275 ms post-stimulus,  $p$   
337  $< 0.05$ ;  $p$ -values estimated using cluster-based permutation tests). However, we found no evidence of  
338 a generalisation of this activity to other time points in the delay period or in anticipation of relevant  
339 events.

340 This first analysis suggested that sensory representations elicited by a specific feature did not gen-  
341 eralise to the delay period. We found a momentary and transient feature-specific signal that peaked  
342 after stimulus presentation. To test whether increasing the size of the training set might increase our  
343 sensitivity to a potentially missed result, we repeated the classification procedure within the rhythmic  
344 conditions only. In this new analysis: (1) data from all trials (excluding a single trial) were used as a  
345 training set (i.e. we used a leave-one-trial-out procedure); (2) we used as the training time the period  
346 around the ERF peak activity (100 to 200 ms). Similar to our previous analysis, we found that only  
347 periods around stimulus presentation had scores higher than chance (auditory attended: from 155 ms  
348 to 220 ms,  $p < 0.001$ ; auditory unattended: 143 ms to 240 ms,  $p < 0.001$ ; visual attended: from 123  
349 ms to 155 ms,  $p = 0.008$ ; visual unattended: from 143 ms to 175 ms,  $p = 0.004$ ; Figure 3 B). We did  
350 not find feature-specific sensory activation during the delay period and patterns evoked by specific  
351 orientations and tones were restricted to periods of stimulus-driven activity.

### 352 **5.3 Sensory cortices pre-activate rhythmically during delay periods**

353 It is known that rhythmic stimulation can entrain neural activity in related sensory areas. Having  
354 found no evidence that this entrainment is feature-specific, we next explored whether multimodal

355 rhythmic stimulation induced non-specific, yet modality-specific, rhythmic pre-activation of sensory  
356 cortices.

357 We again used a temporal generalisation approach, this time to decode the attended modality (visual  
358 or auditory). The attended sensory modality was significantly decodable from the signal across several  
359 time points in both rhythmic and non-rhythmic trials (cluster-based permutation tests: non-rhythmic  
360  $p < 0.001$ ; rhythmic  $p < 0.001$ , Figure 4 A). Importantly, the modality signal extended throughout  
361 the delay periods in both types of trials (Figure 4 A), indicating a pre-activation signal related to  
362 temporal expectation that was not immediately driven by any stimulus. The negative values during  
363 early training periods in rhythmic trials can be explained by noting that the irrelevant (i.e., different  
364 modality) stimulus was presented at those times.

365 In both types of trials, we observed an early pattern of activity (training time 0.08 s to 0.13 s) that  
366 was strong and generalised to different testing times throughout the delay period (Figure 4 A). To  
367 study the temporal dynamics of this activity in more detail, we further analysed performance over time  
368 for a classifier trained on this time window, in both types of trials. Figure 4 B shows how modality  
369 activity evolves. We observed a clear oscillatory modulation of decoding scores, which can be seen  
370 during the delay period for rhythmic trials, and which was absent for non-rhythmic trials. Critically,  
371 the last stimulus presented in this period was at 0.5 s, with no other stimulation after that.

372 An oscillatory modulation of the modality signal was clearly present in the grand-averaged data  
373 (Figure 4 B). We next assessed whether this rhythmicity was reliably present across participants, by  
374 fitting two models to the activity in the delay period for each participant. The first was a linear model  
375 with intercept and slope as free parameters. The second model was a combination of a linear function  
376 with a 1 Hz sine and 1 Hz cosine function (which is equivalent to a 1 Hz sinusoid with phase as a free  
377 parameter) (Zoefel et al., 2019). The combined 1Hz-linear model provided a significantly better fit  
378 of the data for 26 out of 34 participants in the non-rhythmic condition (Wald test controlling for the  
379 extra degree of freedom; F values range: 0.88 to 76.72, critical  $F(2,295)$ : 3.03), and for 31 out of 34  
380 in the rhythmic condition (F values range: 0.61 to 189.47, critical  $F(2,295)$ : 3.03). As the critical test  
381 of whether stimulus periodicity induced a rhythmic modulation of sensory cortex activation during  
382 delay periods, we compared the improvement in model fit that resulted from adding the sinusoid term  
383 between the rhythmic and non-rhythmic trials. The improvement of adding an oscillatory function  
384 was considerably higher for rhythmic than non-rhythmic trials (Wilcoxon signed-rank test of relative  
385 F-values across participants;  $Z = 3.77$ ,  $p < 0.001$ ; Figure 4 C, top left). Furthermore, the model fits for  
386 the rhythmic trials had significantly higher 1 Hz amplitudes than those for non-rhythmic (Wilcoxon  
387 signed-rank test of 1Hz amplitudes across participants;  $Z = 3.86$ ,  $p < 0.001$ ; Figure 4 C, top right).

388 If the delay-period oscillatory modality signal is the result of entrainment by the rhythmic stimuli,  
389 one would expect the phases of this signal to be consistent across participants, specifically for the  
390 rhythmic (and not the non-rhythmic) condition. This is indeed what we observed: phases were not  
391 significantly different from uniform in non-rhythmic trials (Rayleigh test;  $Z(33) = 0.07$ ,  $p = 0.93$ ), but  
392 we observed a clear phase concentration in rhythmic trials (average phase = 0.525 rad,  $Z(33) = 9.37$ ,  
393  $p < 0.001$ ; Figure 4 C, bottom panels).

394 Taken together, these results demonstrate that the rhythmic stimulation resulted in a rhythmic  
395 pre-activation of sensory cortices, which was consistent across participants. Importantly, this pre-  
396 activation was observed during the delay period, i.e. without any ongoing sensory stimulation, sug-  
397 gesting a true entrainment of endogenous neural signals.

## 398 6 Discussion

399 In the present study, we investigated whether rhythmic temporal prediction interacts with feature-  
400 based expectations to induce rhythmic sensory templates for anticipated stimuli. Behaviourally, we  
401 found that temporal expectations improved performance, but not in a rhythmic manner. Using multi-  
402 variate pattern analysis of feature-specific signals, we found that stimulus information was present only  
403 during stimulation and not during the delay period, contrary to our expectations. Instead, we observed  
404 feature-unspecific but modality-specific activity during the delay, reflecting a rhythmic pre-activation  
405 of the relevant sensory cortices that peaked at the expected, behaviourally relevant, moments.

406 Contrary to what we expected, performance was not modulated in line with the rhythm of the  
407 task. Although participants exhibited worse performance for the first SOA (both in response times  
408 and in accuracy), performance was not different between the other SOAs. According to Dynamic  
409 Attending Theory (DAT) (Jones and Boltz, 1989; Jones et al., 2002), in-phase intervals should lead  
410 to faster and more accurate responses than anti-phase intervals. In this study, we only found a  
411 general increase in performance as a function of delay. This is a well-known result called the variable  
412 foreperiod effect that can be explained by the increasing conditional probability of target occurrence  
413 with increasing SOAs, also known as the “hazard function” (Näätänen, 1970; Nobre et al., 2007;  
414 Nobre, 2010).

415 Several studies have found evidence in support of the DAT: performance is improved in rhythmic  
416 compared to arrhythmic conditions (Rohenkohl et al., 2012; Morillon et al., 2016), and the phase  
417 of entrained neural oscillations by an external rhythm influences auditory (Henry and Obleser, 2012;  
418 Bauer et al., 2018) and visual perception (Cravo et al., 2013; Chota and VanRullen, 2019). Thus, there

419 is a large literature suggesting that environmental rhythms can entrain attentional (i.e., endogenous,  
420 neural) rhythms and modulate perception (Henry and Herrmann, 2014). Nevertheless, results are not  
421 as clear when analysing post-entrainment effects, i.e., after the offset of the rhythm. Different studies  
422 have shown behavioural impairments (Hickok et al., 2015; Spaak et al., 2014), benefits (Jones et al.,  
423 2002; Barnes and Jones, 2000) or effects that were highly participant-dependent (Bauer et al., 2015;  
424 Jones, 2019) for in-phase versus anti-phase time points. Differences in the task (detection/discrimina-  
425 tion), the sensory modality (time/auditory/visual), and the stimulated frequency range (alpha/delta)  
426 could have led to this variety of different effects. Together with our null result regarding rhythmicity in  
427 post-entrainment behaviour, these results highlight the necessity for additional studies to understand  
428 the factors that determine the influence of rhythms on behaviour.

429 Previous studies have shown that feature-based expectations about an event can induce anticipatory  
430 activation templates in sensory cortex (Kok et al., 2014; Kok et al., 2017). Here we tested this  
431 possibility in different modalities (vision and audition), conditions (rhythmic and non-rhythmic), and  
432 levels of task relevance (attended or unattended). In all conditions, we found a similar pattern:  
433 stimulus-specific information could be decoded during the stimulation period only, and not during  
434 the following delay period. There are several differences between our and previous experiments,  
435 which might explain this discrepancy. One important difference may be the information to be stored.  
436 In previous studies, stimulus-specific pre-activation was found after an informative cue presented  
437 in anticipation of the target stimulus. Our task, in contrast, required the maintenance of target  
438 information (tone frequency or grating orientation) that needed to be later compared to a probe; thus,  
439 participants had already seen the target itself before the period of interest. Classifiers were always  
440 trained on the activity evoked by the target stimulus, since we were trying to detect anticipatory  
441 activity similar to stimulation, as in previous work. It has been argued that such stimulus-identical  
442 delay activity is not strictly necessary for working memory maintenance, and that information might  
443 have been stored in a different, possibly silent, format (Wolff et al., 2015; Mongillo et al., 2008;  
444 Stokes, 2015). It is possible that templates may be instrumental for automatic associations between  
445 two events, while our paradigm favours a more prospective, silent, coding scheme. This would also fit  
446 with the behavioural task: unlike previous works, in our task, participants had to compare upcoming  
447 stimulation with what came before, thus an exact stimulus-specific pre-activation of the earlier stimulus  
448 might even impair behavioural performance. In line with this interpretation, it has been reported that  
449 neural reactivation increases serial biases (Barbosa et al., 2020), which would impair performance here.

450 Although we did not find stimulus-specific anticipatory information, there was a clear pre-activation  
451 of the relevant sensory cortices. The early modality-specific signal was decodable in a rhythmic fashion

452 in rhythmic trials, and it was also present close to the end of the delay period in non-rhythmic trials.  
453 Thus, the pre-activation was locked to the temporal structure of the task and peaked at the time  
454 points of expected stimulation. This modality-specific pre-activation is consistent with recent results  
455 that showed that even task-irrelevant information was better decoded when presented at moments  
456 close to a highly likely target presentation (Auksztulewicz et al., 2019). Analogous to these previous  
457 results, this boosting of early sensory modality representations in the MEG signal during the delay  
458 could be explained by increases in baseline excitability of task-relevant sensory areas (as opposed to  
459 task-irrelevant ones). Thus, the modality-specific decoding reflects a relative measure of neuronal  
460 excitability between auditory and visual cortex. It has previously been shown that endogenous neural  
461 oscillations in visual cortex bias perception through rhythmic fluctuations in baseline excitability (Iemi  
462 et al., 2017). Our results suggest that similar fluctuations can be leveraged in a cross-modal setting  
463 to optimally prepare the brain for upcoming stimuli, specifically of a task-relevant modality.

464 Previous studies have shown that neuronal population excitability states can be entrained to external  
465 rhythms as a preparatory mechanism for optimally processing upcoming stimuli (Lakatos et al., 2008;  
466 Schroeder and Lakatos, 2009; Henry and Obleser, 2012; Lakatos et al., 2013; Herrmann et al., 2016),  
467 which is, in turn, under strong top-down control (Lakatos et al., 2019). It is important to distinguish  
468 entrainment from other factors such as superimposed evoked responses, resonance, and endogenous  
469 predictions (Guevara Erra et al., 2017; Helfrich et al., 2019), which may interact with entrainment  
470 (Haegens, 2020). In the present study, we used a decoding analysis of the expected sensory modality  
471 as a slightly different than usual approach to evaluate entrainment. We analysed the engagement of  
472 early sensory cortices during a silence period after two conditions: a single evoked stimulus, and a 1  
473 Hz stream. Instead of computing the traditional Fourier transform to evaluate oscillatory power and  
474 phase consistency in neural data, we computed the relative neuronal excitability between visual and  
475 auditory cortex. We investigated whether rhythmic excitability shifts at 1 Hz were enhanced at post-  
476 entrained compared to post single stimulus periods. Our results are in line with previously published  
477 work in monkeys (Lakatos et al., 2008), which we extended by showing that: (1) the oscillatory  
478 pattern is present in the absence of external stimulation, and (2) the oscillatory pattern more strongly  
479 arises after a rhythmic stream than after a single stimulus. These two points, combined, strongly  
480 suggest that our results were not due to superposition of responses or a simple resonance mechanism.  
481 Although the combined sinusoid-linear model was also a better fit than the purely linear model for  
482 non-rhythmic trials, this improvement was considerably stronger in rhythmic trials. Furthermore,  
483 phase was scattered uniformly for the non-rhythmic trials, but consistent in rhythmic trials.

484 Lastly, in our experimental setup, in-phase moments were also moments in which there was a



485 higher probability of target presentation. For this reason, it is not possible to dissociate the effects of  
486 locally stimulus-driven oscillatory entrainment from globally generated predictive signals introduced  
487 by the probability manipulation. Given that we observed a (non-rhythmic) increase of decoding scores  
488 towards the end of the delay period in non-rhythmic trials, globally generated predictions might explain  
489 part of our results. Whether these endogenous predictions are enhanced in the presence of rhythms,  
490 and/or whether they interact with local sensory oscillatory entrainment is still an open question that  
491 should be addressed in future studies.

492 In summary, our results add to the body of evidence showing that the brain extracts temporal  
493 regularities from the environment to optimally prepare in time for upcoming stimuli. Importantly, we  
494 demonstrate that one specific mechanism for such temporal attunement in a visual/auditory cross-  
495 modal setting is the phasic modulation of excitability in early visual and auditory cortex, in lockstep  
496 with the environment. We furthermore show that the occurrence of stimulus-specific, actively main-  
497 tained, early sensory anticipatory templates, as reported previously, appears to depend on the specifics  
498 of the task at hand, and is not a universal phenomenon.

## 499 References

- 500 Aukstulewicz R, Myers NE, Schnupp JW, Nobre AC (2019) Rhythmic temporal expectation boosts  
501 neural activity by increasing neural gain. *Journal of Neuroscience* pp. 0925–19.
- 502 Bar M (2004) Visual objects in context. *Nature Reviews Neuroscience* 5:617–629.
- 503 Barbosa J, Stein H, Martinez RL, Galan-Gadea A, Li S, Dalmau J, Adam KC, Valls-Solé J, Con-  
504 stantinidis C, Compte A (2020) Interplay between persistent activity and activity-silent dynamics in  
505 the prefrontal cortex underlies serial biases in working memory. *Nature Neuroscience* 23:1016–1024.
- 506 Barnes R, Jones MR (2000) Expectancy, attention, and time. *Cognitive psychology* 41:254–311.
- 507 Bastiaansen MC, Knösche TR (2000) Tangential derivative mapping of axial meg applied to event-  
508 related desynchronization research. *Clinical Neurophysiology* 111:1300–1305.
- 509 Bauer AKR, Bleichner MG, Jaeger M, Thorne JD, Debener S (2018) Dynamic phase alignment of  
510 ongoing auditory cortex oscillations. *Neuroimage* 167:396–407.
- 511 Bauer AKR, Jaeger M, Thorne JD, Bendixen A, Debener S (2015) The auditory dynamic attending  
512 theory revisited: A closer look at the pitch comparison task. *Brain Research* 1626:198–210.

- 513 Besle J, Schevon CA, Mehta AD, Lakatos P, Goodman RR, McKhann GM, Emerson RG, Schroeder  
514 CE (2011) Tuning of the human neocortex to the temporal dynamics of attended events. *Journal of*  
515 *Neuroscience* 31:3176–3185.
- 516 Brainard DH (1997) The psychophysics toolbox. *Spatial Vision* 10:433–436.
- 517 Breska A, Deouell LY (2017) Dance to the rhythm, cautiously: Isolating unique indicators of oscil-  
518 latory entrainment. *PLoS biology* 15:e2003534.
- 519 Capilla A, Pazo-Alvarez P, Darriba A, Campo P, Gross J (2011) Steady-state visual evoked potentials  
520 can be explained by temporal superposition of transient event-related responses. *PloS one* 6:e14543.
- 521 Chota S, VanRullen R (2019) Visual entrainment at 10 hz causes periodic modulation of the flash  
522 lag illusion. *Frontiers in neuroscience* 13:232.
- 523 Cravo AM, Rohenkohl G, Wyart V, Nobre AC (2013) Temporal expectation enhances contrast  
524 sensitivity by phase entrainment of low-frequency oscillations in visual cortex. *Journal of Neuro-*  
525 *science* 33:4002–4010.
- 526 de Lange FP, Heilbron M, Kok P (2018) How do expectations shape perception? *Trends in cognitive*  
527 *sciences* 22:764–779.
- 528 Doelling KB, Assaneo MF, Bevilacqua D, Pesaran B, Poeppel D (2019) An oscillator model  
529 better predicts cortical entrainment to music. *Proceedings of the National Academy of Sci-*  
530 *ences* 116:10113–10121.
- 531 Guevara Erra R, Perez Velazquez JL, Rosenblum M (2017) Neural synchronization from the per-  
532 spective of non-linear dynamics. *Frontiers in computational neuroscience* 11:98.
- 533 Haegens S (2020) Entrainment revisited: a commentary on meyer, sun, and martin (2020). *Language,*  
534 *Cognition and Neuroscience* pp. 1–5.
- 535 Haegens S, Golumbic EZ (2018) Rhythmic facilitation of sensory processing: a critical review.  
536 *Neuroscience & Biobehavioral Reviews* 86:150–165.
- 537 Helfrich RF, Breska A, Knight RT (2019) Neural entrainment and network resonance in support of  
538 top-down guided attention. *Current opinion in psychology* .
- 539 Henry MJ, Herrmann B (2014) Low-frequency neural oscillations support dynamic attending in  
540 temporal context. *Timing & Time Perception* 2:62–86.

- 541 Henry MJ, Herrmann B, Obleser J (2014) Entrained neural oscillations in multiple frequency bands  
542 comodulate behavior. *Proceedings of the National Academy of Sciences* 111:14935–14940.
- 543 Henry MJ, Obleser J (2012) Frequency modulation entrains slow neural oscillations and optimizes  
544 human listening behavior. *Proceedings of the National Academy of Sciences* 109:20095–20100.
- 545 Herrmann B, Henry MJ, Haegens S, Obleser J (2016) Temporal expectations and neural amplitude  
546 fluctuations in auditory cortex interactively influence perception. *Neuroimage* 124:487–497.
- 547 Hickok G, Farahbod H, Saberi K (2015) The rhythm of perception: Entrainment to acoustic rhythms  
548 induces subsequent perceptual oscillation. *Psychological science* 26:1006–1013.
- 549 Iemi L, Chaumon M, Crouzet SM, Busch NA (2017) Spontaneous neural oscillations bias perception  
550 by modulating baseline excitability. *Journal of Neuroscience* 37:807–819.
- 551 JASP Team (2018) JASP (Version 0.9.0)[Computer software].
- 552 Jones A (2019) Temporal expectancies and rhythmic cueing in touch: The influence of spatial  
553 attention. *Cognition* 182:140–150.
- 554 Jones MR, Boltz M (1989) Dynamic attending and responses to time. *Psychological review* 96:459.
- 555 Jones MR, Moynihan H, MacKenzie N, Puente J (2002) Temporal aspects of stimulus-driven attend-  
556 ing in dynamic arrays. *Psychological science* 13:313–319.
- 557 Kok P, Failing MF, de Lange FP (2014) Prior expectations evoke stimulus templates in the primary  
558 visual cortex. *Journal of Cognitive Neuroscience* 26:1546–1554.
- 559 Kok P, Mostert P, De Lange FP (2017) Prior expectations induce prestimulus sensory templates.  
560 *Proceedings of the National Academy of Sciences* p. 201705652.
- 561 Lakatos P, Karmos G, Mehta AD, Ulbert I, Schroeder CE (2008) Entrainment of neuronal oscillations  
562 as a mechanism of attentional selection. *Science* 320:110–113.
- 563 Lakatos P, Gross J, Thut G (2019) A new unifying account of the roles of neuronal entrainment.  
564 *Current Biology* 29:R890–R905.
- 565 Lakatos P, Musacchia G, O’Connell MN, Falchier AY, Javitt DC, Schroeder CE (2013) The spec-  
566 trotemporal filter mechanism of auditory selective attention. *Neuron* 77:750–761.
- 567 Maris E, Oostenveld R (2007) Nonparametric statistical testing of eeg-and meg-data. *Journal of*  
568 *neuroscience methods* 164:177–190.

- 569 Mongillo G, Barak O, Tsodyks M (2008) Synaptic theory of working memory. *Science* 319:1543–1546.
- 570 Morillon B, Schroeder CE, Wyart V, Arnal LH (2016) Temporal prediction in lieu of periodic  
571 stimulation. *Journal of Neuroscience* 36:2342–2347.
- 572 Näätänen R (1970) The diminishing time-uncertainty with the lapse of time after the warning signal  
573 in reaction-time experiments with varying fore-periods. *Acta Psychologica* 34:399–419.
- 574 Nobre AC, Van Ede F (2018) Anticipated moments: temporal structure in attention. *Nature Reviews*  
575 *Neuroscience* 19:34.
- 576 Nobre AC (2001) Orienting attention to instants in time. *Neuropsychologia* 39:1317–1328.
- 577 Nobre AC, Correa A, Coull JT (2007) The hazards of time. *Current opinion in neurobiol-*  
578 *ogy* 17:465–470.
- 579 Nobre K (2010) *Attention and time* Oxford University Press, USA.
- 580 Obleser J, Henry MJ, Lakatos P (2017) What do we talk about when we talk about rhythm? *PLoS*  
581 *biology* 15:e2002794.
- 582 Oliva A, Torralba A (2007) The role of context in object recognition. *Trends in cognitive sci-*  
583 *ences* 11:520–527.
- 584 Oostenveld R, Fries P, Maris E, Schoffelen JM (2011) Fieldtrip: open source software for advanced  
585 analysis of meg, eeg, and invasive electrophysiological data. *Computational intelligence and neuro-*  
586 *science* 2011:1.
- 587 Prins N, Kingdom FA (2018) Applying the model-comparison approach to test specific research  
588 hypotheses in psychophysical research using the palamedes toolbox. *Frontiers in psychology* 9.
- 589 Rohenkohl G, Cravo AM, Wyart V, Nobre AC (2012) Temporal expectation improves the quality of  
590 sensory information. *Journal of Neuroscience* 32:8424–8428.
- 591 SanMiguel I, Widmann A, Bendixen A, Trujillo-Barreto N, Schröger E (2013) Hearing silences:  
592 human auditory processing relies on preactivation of sound-specific brain activity patterns. *Journal*  
593 *of Neuroscience* 33:8633–8639.
- 594 Schroeder CE, Lakatos P (2009) Low-frequency neuronal oscillations as instruments of sensory  
595 selection. *Trends in Neurosciences* 32:9–18.

- 596 Seriès P, Seitz A (2013) Learning what to expect (in visual perception). *Frontiers in human neuro-*  
597 *science* 7:668.
- 598 Spaak E, de Lange FP (2020) Hippocampal and prefrontal theta-band mechanisms underpin implicit  
599 spatial context learning. *Journal of Neuroscience* 40:191–202.
- 600 Spaak E, de Lange FP, Jensen O (2014) Local entrainment of alpha oscillations by visual stimuli  
601 causes cyclic modulation of perception. *Journal of Neuroscience* 34:3536–3544.
- 602 Stokes MG (2015) ‘activity-silent’ working memory in prefrontal cortex: a dynamic coding framework.  
603 *Trends in cognitive sciences* 19:394–405.
- 604 Stolk A, Todorovic A, Schoffelen JM, Oostenveld R (2013) Online and offline tools for head movement  
605 compensation in meg. *Neuroimage* 68:39–48.
- 606 Summerfield C, De Lange FP (2014) Expectation in perceptual decision making: neural and com-  
607 putational mechanisms. *Nature Reviews Neuroscience* 15:745–756.
- 608 van Diepen RM, Mazaheri A (2018) The caveats of observing inter-trial phase-coherence in cognitive  
609 neuroscience. *Scientific reports* 8:2990.
- 610 Watson AB, Pelli DG (1983) Quest: A bayesian adaptive psychometric method. *Perception &*  
611 *psychophysics* 33:113–120.
- 612 Wolff MJ, Ding J, Myers NE, Stokes MG (2015) Revealing hidden states in visual working memory  
613 using electroencephalography. *Frontiers in Systems Neuroscience* 9:123.
- 614 Zoefel B, Davis MH, Valente G, Riecke L (2019) How to test for phasic modulation of neural and  
615 behavioural responses. *NeuroImage* p. 116175.

616 **7 Figures**

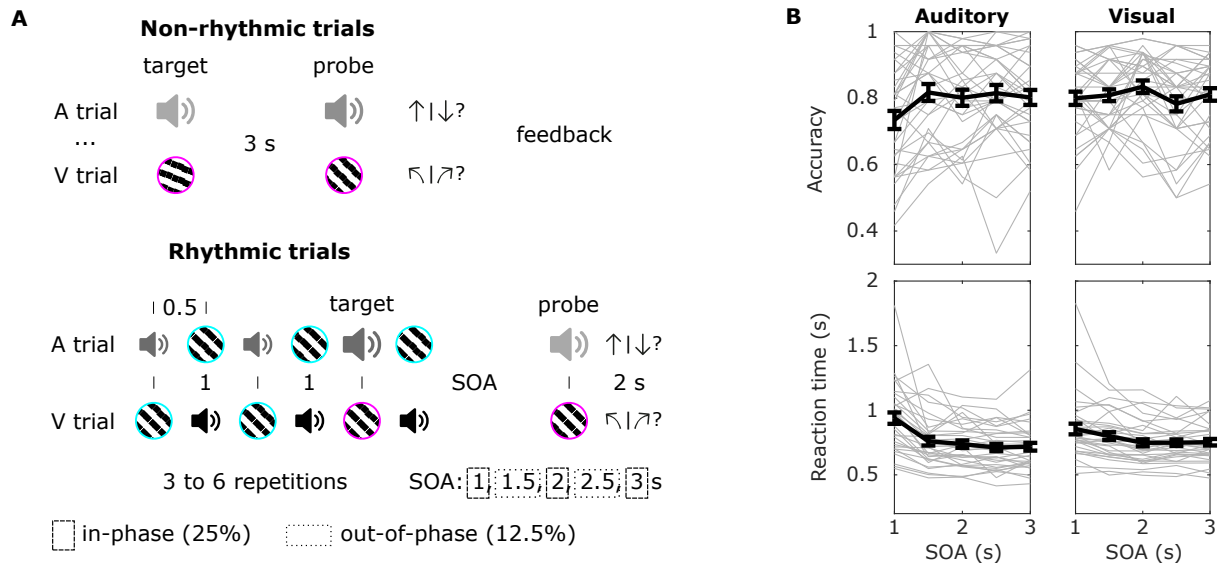

Figure 1: **Experimental design and behavioural results.** A) Schematic of the non-rhythmic and rhythmic trials. In both tasks, there were visual and auditory blocks. In visual blocks (V trial), participants had to discriminate whether the probe had a counterclockwise or clockwise tilt compared to the target(s). In auditory blocks (A trials), they had to judge whether the pitch was lower or higher. The non-rhythmic trials had a fixed configuration of one target followed by one probe. In rhythmic trials, the relevant target stimulus was presented several times (3 to 6) with a fixed interval between presentations (1s) in order to induce a 1Hz entrainment. Interleaved and irrelevant to the task, a second stream of stimuli in the unattended sensory modality stimuli were presented. The last relevant target stimulus of the sequence was marked by a change in an irrelevant feature to warn participants about the oncoming probe presentation. The warning signal was a higher volume sound (illustrated by a larger sound icon, A trials) or a magenta outline (V trials). The interval between target and probe could be 1, 1.5, 2, 2.5 or 3 s with the respective probabilities: 25%, 12.5%, 25%, 12.5%, 25%. B) Accuracy and reaction times (mean and standard error of the mean in bold) for the rhythmic task, as a function of SOA and attended modality. Individual participant data are shown in lighter grey.

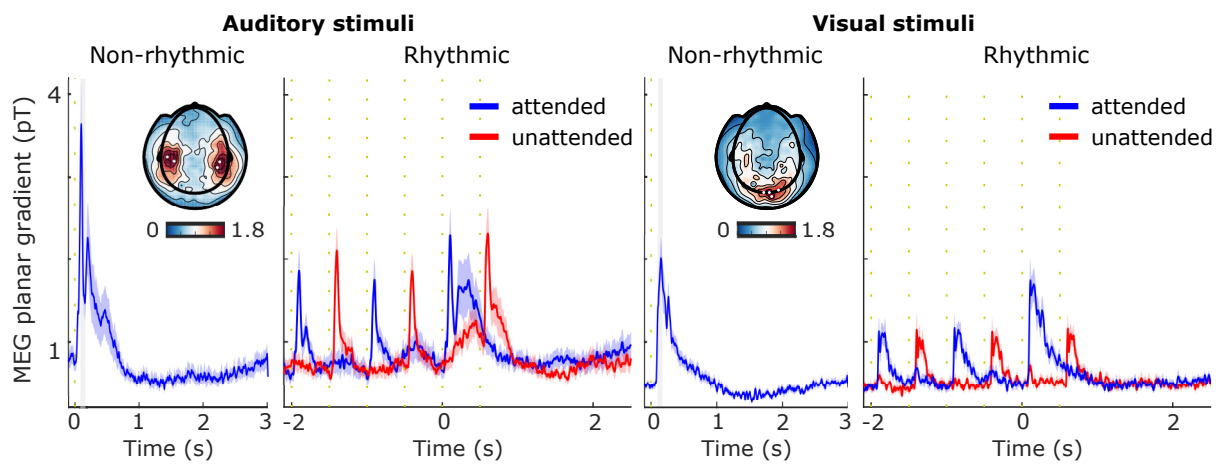

Figure 2: Event related field (mean and standard error of the mean) of non-rhythmic, attended (blue) and unattended (red) rhythmic longest-SOA trials in auditory and visual sensors. Time 0 represents the target presentation. Inset topographies illustrate the average activity related to non-rhythmic (auditory and visual) targets from 100 to 200 ms (lighter grey box period), and the white dots represent the most active sensors within this time window. The corresponding sensors were selected for representing the ERFs. Vertical dashed line (yellow) indicates a stimulus occurrence.

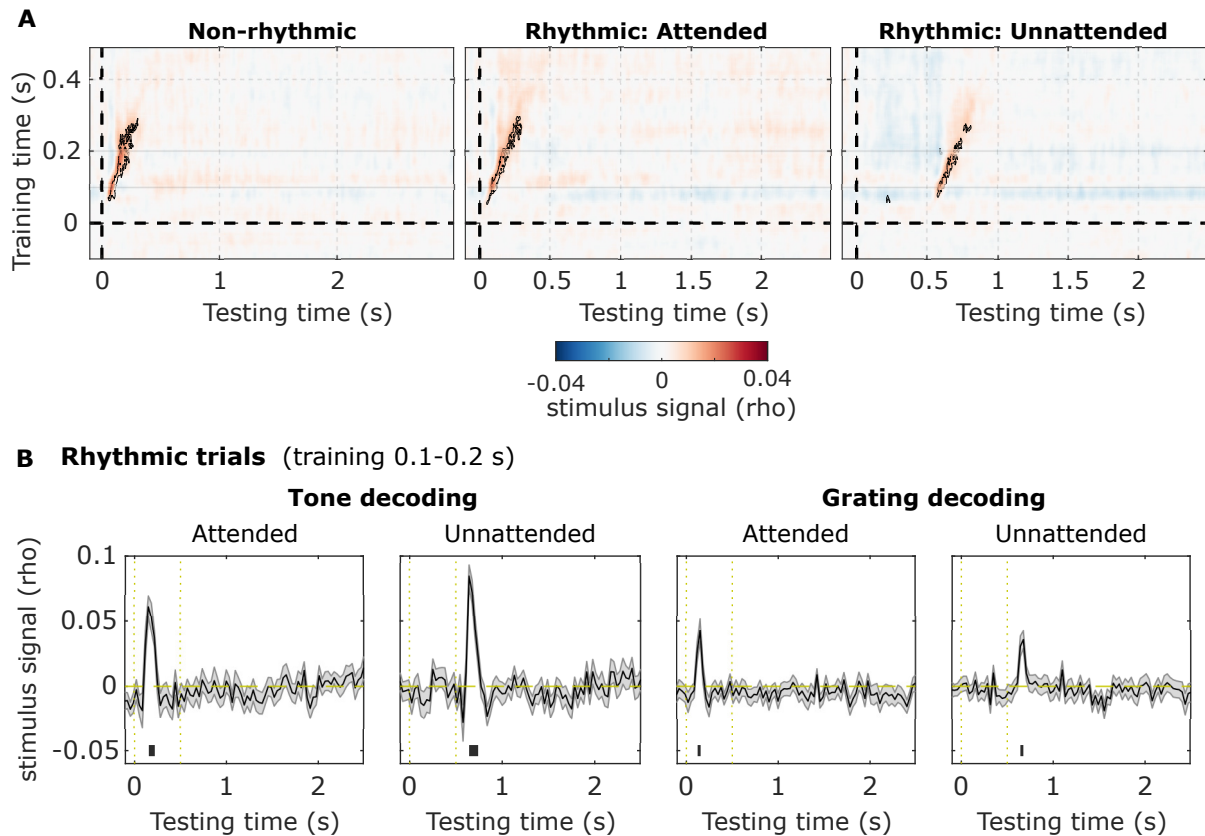

Figure 3: **Multivariate decoding of stimulus-specific information (pitch/orientation).** A) Temporal generalisation matrices for non-rhythmic, attended and unattended longest-SOA rhythmic trials. Target presentation occurred at 0 s, and the unattended stimulus (rhythmic trials) at 0.5 s. Significant clusters ( $p < 0.05$ ) are contoured in black, thus illustrating a momentary transient feature-specific signal after stimulus presentation. B) Leave-one-trial-out cross-validation results using the averaged sensor activation from 0.1 to 0.2 s as training data. Vertical dashed line (yellow) indicates attended ( $t = 0$  s) and unattended ( $t = 0.5$  s) stimulus occurrence and the black bars indicate the significant clusters (all  $p < 0.01$ ). Only actual stimulus periods, and not the stimulus-absent delay period, had scores higher than chance.



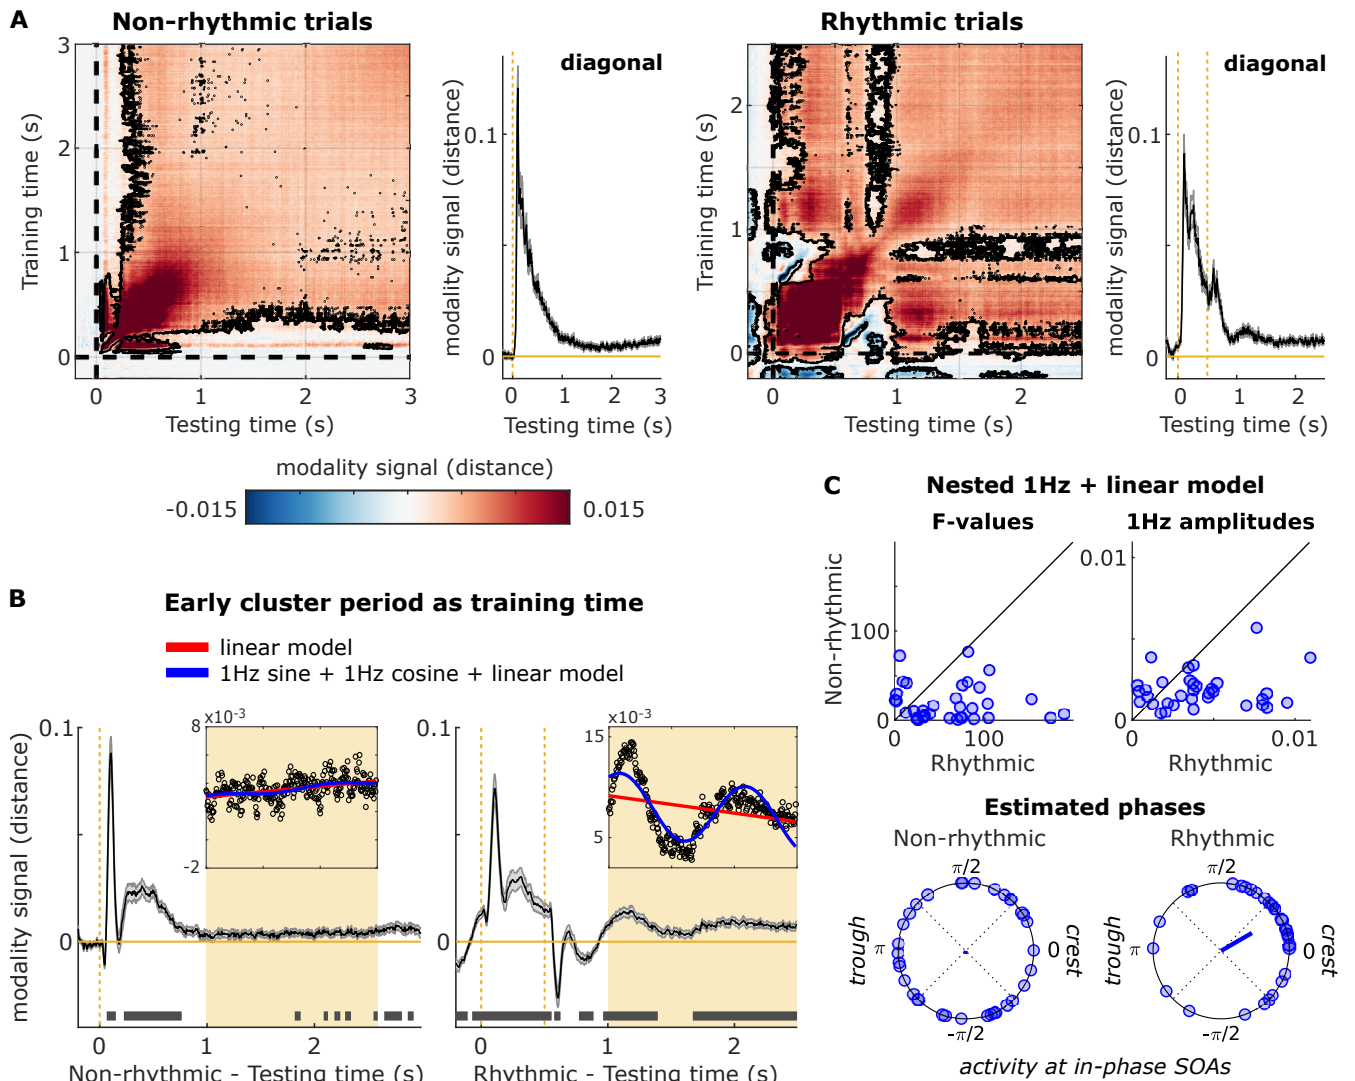

Figure 4: **Multivariate decoding of relevant modality information (visual/auditory).** A) Temporal generalisation matrices indicating a generalised sustained activation (significant clusters surrounded by a black line). In non-rhythmic trials, a significant cluster (training time 0.08 to 0.13 s) illustrates that an early sensory representation pops out at the end of the interval. B) Temporal evolution of such early sensory representation in both non-rhythmic and rhythmic conditions. Significant clusters are indicated as grey bars. In rhythmic trials, modality signal oscillated after stimulation period. Two models were fitted into the no-stimulus delay data (1 s to 2.5 s, inset) for non and rhythmic conditions. C) F-stats of nested models and the amplitude of the fitted sinusoid. This indicates that 1Hz oscillation model explains better the modality signal behaviour in rhythmic than in non-rhythmic trials. Furthermore, there is no phase preference in non-rhythmic trials, but phases are highly clustered in rhythmic trials, indicating a better representation at in-phase/highly expected delays.
